# Supplementary material for: Cracking Behavior of Upgraded Waste Plastic Pyrolysis oil to lighter olefins (C 2 -C 3 ): A study on Performance, Product Distribution and Outlook for a Circular Hydrocarbon Economy
Source: Royal Society of Chemistry journal article supplement (doi:10.1039/d5su00937e), 2026-01-01
Supplement: d5su00937e2.xlsx [file d5su00937e2.xlsx]

## Sheet: GC-MS, DPO
	#Peak	Total %	Name (DPO)	CAS#
	1	0.0005	4-Methyl-1,3-pentadiene	000926-56-7
	2	0.0034	1-Pentene, 2,4-dimethyl-	002213-32-3
	3	0.0016	2-Pentene, 4,4-dimethyl-, (E)-	000690-08-4
	4	0.0014	Benzene	000071-43-2
	5	0.0017	1,3-Pentadiene, 2,4-dimethyl-	001000-86-8
	6	0.0037	2-Heptene, 4-methyl-, (E)-	066225-17-0
	7	0.0182	Heptane, 4-methyl-	000589-53-7
	8	0.0019	3-Octene, (E)-	014919-01-8
	9	0.0135	1,2,4,4-Tetramethylcyclopentene	065378-76-9
	10	0.0009	2-Pentene, 4,4-dimethyl-	026232-98-4
	11	0.0042	2,2-Dimethyl-3-heptene trans	019550-75-5
	12	0.0092	Heptane, 2,4-dimethyl-	002213-23-2
	13	0.0123	3-Amino-2-cyclohexenone	005220-49-5
	14	0.0728	2,4-Dimethyl-1-heptene	019549-87-2
	15	0.008	Cyclohexane, 1,3,5-trimethyl-, (…	001795-26-2
	16	0.0069	Ethylbenzene	000100-41-4
	17	0.012	o-Xylene	000095-47-6
	18	0.0411	Cyclopentane, 1,2,3,4,5-pentamet...	1000152-79-7
	19	0.0033	Phenol, 3-ethyl-	000620-17-7
	20	0.0027	3,4-Decadiene	037050-04-7
	21	0.0043	Benzene, (1-methylethyl)-	000098-82-8
	22	0.0023	2-Heptanone, 4-methyl-	006137-06-0
	23	0.002	Benzene, propyl-	000103-65-1
	24	0.0013	Nonane, 4-methyl-	017301-94-9
	25	0.002	Benzene, 1-ethyl-3-methyl-	000620-14-4
	26	0.0087	Benzene, 1,3,5-trimethyl-	000108-67-8
	27	0.0054	alpha-Methylstyrene	000098-83-9
	28	0.0012	Benzonitrile	000100-47-0
	29	0.0027	1-Decene	000872-05-9
	30	0.0086	Benzene, 1,2,3-trimethyl-	000526-73-8
	31	0.0044	1-Hexene, 3,3-dimethyl-	003404-77-1
	32	0.003	1,1'-Bicyclooctyl	006708-17-4
	33	0.0153	Octane, 3,3-dimethyl-	004110-44-5
	34	0.0146	Heptane, 3,3,5-trimethyl-	007154-80-5
	35	0.012	1-Undecene	000821-95-4
	36	0.0023	Benzene, 1-ethenyl-2-methyl-	000611-15-4
	37	0.0115	Cyclopentane, (2-methylbutyl)-	053366-38-4
	38	0.0072	Benzene, 2-propenyl-	000300-57-2
	39	0.0025	2-Undecene, 4-methyl-	091695-32-8
	40	0.0034	Cyclopentane, 1-butyl-2-propyl-	062199-50-2
	41	0.0078	Cyclohexane, 1,2-diethyl-, cis-	000824-43-1
	42	0.0083	Decane, 3,6-dimethyl-	017312-53-7
	43	0.0148	Sulfurous acid, hexyl octyl ester	1000309-13-0
	44	0.0063	2-Dodecene, (E)-	007206-13-5
	45	0.0067	Bicyclo[2.2.1]heptane-2,5-dione,...	004230-32-4
	46	0.0233	Ethanone, 1-cyclopentyl-	006004-60-0
	47	0.0193	5-Dodecene, (E)-	007206-16-8
	48	0.0023	Cyclohexene, 1,4,6,6-tetramethyl-	070092-37-4
	49	0.0033	Undecane	001120-21-4
	50	0.0036	E-2-Octenyl tiglate	084271-97-6
	51	0.0218	3-Methyl-2-butenoic acid, 6-ethy...	1000279-22-7
	52	0.0014	Naphthalene, decahydro-1,2-dimet...	003604-14-6
	53	0.0025	Benzene, 4-ethyl-1,2-dimethyl-	000934-80-5
	54	0.0192	Cyclohexane, 1,1,4,4-tetramethyl-	002223-52-1
	55	0.0113	2,3-Dimethyl-3-heptene, (Z)-	059643-73-1
	56	0.002	3a,6-Methano-3aH-indene, 2,3,6,7...	098640-29-0
	57	0.0051	Benzene, 1-methyl-4-(1-methylpro...	001595-16-0
	58	0.0053	Cyclohexane, 1,1'-(1-methylethyl...	054934-90-6
	59	0.0052	Cyclopropanemethanol, 2-methyl-2...	098678-70-7
	60	0.0023	1,3-Diisopropyl cyclohexane	007045-70-7
	61	0.004	4-Methyl-2-heptene	003404-56-6
	62	0.0071	Naphthalene	000091-20-3
	63	0.0033	Dodecane	000112-40-3
	64	0.0018	1H-Indene, 2,3-dihydro-4,7-dimet...	006682-71-9
	65	0.0024	Methanesulfenyl chloride, triflu...	000421-17-0
	66	0.0016	Cyclohexane, 1-ethyl-2,3-dimethyl-	007058-05-1
	67	0.005	Phenol, 2-(1-methylethyl)-, meth...	002631-40-5
	68	0.0372	Cyclohexane, 1,2,4-trimethyl-	002234-75-5
	69	0.0076	Dodecane, 4,6-dimethyl-	061141-72-8
	70	0.0144	Hexane, 3,3-dimethyl-	000563-16-6
	71	0.0019	Dodecane, 4-methyl-	006117-97-1
	72	0.0019	3-Hexene, 2,3-dimethyl-	007145-23-5
	73	0.0036	n-Nonylcyclohexane	002883-02-5
	74	0.0065	3-Ethyl-3-methylheptane	017302-01-1
	75	0.0097	Dodecane, 2,6,11-trimethyl-	031295-56-4
	76	0.0029	Tridecane	000629-50-5
	77	0.0099	Bis(2-ethylhexyl) hydrogen phosp...	003658-48-8
	78	0.0227	4-Isopropyl-1,3-cyclohexanedione	062831-62-3
	79	0.0346	Cyclohexane, 1,2-diethyl-1-methy...	061141-79-5
	80	0.0056	2,6-Dodecadien-1-ol, 3,7,11-trim...	020576-56-1
	81	0.0027	Benzenebutanenitrile	002046-18-6
	82	0.0017	Cyclohexane, 1,1,3,5-tetramethyl...	050876-32-9
	83	0.0021	Cyclohexane, 1,1'-(1,4-butanediy...	006165-44-2
	84	0.0329	3-Decene, 2,2-dimethyl-, (E)-	055499-02-0
	85	0.0213	3-Heptene, 2,2,3,5,6-pentamethyl-	116164-06-8
	86	0.0043	Oleyl alcohol , acetate	998492-92-1
	87	0.0043	Cyclopentane, 1-butyl-2-ethyl-	072993-32-9
	88	0.0038	2-Tetradecene, (E)-	035953-54-9
	89	0.0056	Tetradecane	000629-59-4
	90	0.0029	Naphthalene, 1,2-dimethyl-	000573-98-8
	91	0.0057	Neopentylidenecyclohexane	039546-80-0
	92	0.0555	Cyclohexane, 1-ethyl-2-propyl-	062238-33-9
	93	0.0016	1-Cyclohexyl-2-methyl-prop-2-en-...	025183-82-8
	94	0.0075	Hexadecane, 3-methyl-	006418-43-5
	95	0.0249	Tetradecane, 2,6,10-trimethyl-	014905-56-7
	96	0.0037	Cyclopentane, 1-pentyl-2-propyl-	062199-51-3
	97	0.0085	Nonane, 2,6-dimethyl-	017302-28-2
	98	0.0047	1-Heptadecanol	001454-85-9
	99	0.0107	Pentadecane	000629-62-9
	100	0.0192	Cyclohexane, 1,2,4-trimethyl-	002234-75-5
	101	0.004	Decane, 3,8-dimethyl-	017312-55-9
	102	0.0081	Heptadecane, 8-methyl-	013287-23-5
	103	0.0036	Cyclohexane, 1,2,3,4,5,6-hexaethyl-	001795-14-8
	104	0.0066	Hexadecane	000544-76-3
	105	0.0035	2-Methyl-Z-4-tetradecene	1000130-78-3
	106	0.005	Cyclohexane, 1,1,2-trimethyl-	007094-26-0
	107	0.0027	Bicyclo[3.1.1]heptan-3-one, 2,6,...	000547-60-4
	108	0.0045	Pentadecane, 2,6,10-trimethyl-	003892-00-0
	109	0.0029	1-Iodoundecane	004282-44-4
	110	0.0018	Cyclopentane, propyl-	002040-96-2
	111	0.0096	Heptadecane	000629-78-7
	112	0.0042	1,2,4-Triazole, 5-cyclohexanecar...	021051-17-2
	113	0.0025	Cyclohexanecarboxylic acid, 2-et...	016397-74-3
	114	0.0085	Cyclohexane, 1-ethyl-2,4-dimethyl-	061142-69-6
	115	0.0068	Triallylsilane	001116-62-7
	116	0.0029	2,3-Dimethyldodecane	006117-98-
	117	0.0019	Cycloundecanone	000878-13-7
	118	0.0011	Octadecane	000593-45-3
	119	0.0034	2-Pentene-1,4-dione, 1-(1,2,2-tr...	1000196-77-9
	120	0.0012	Cyclopentane, 1,2-dibutyl-	062199-52-4
	121	0.0007	Eicosane	000112-95-8
	122	0.0013	2-sec-Butyl-3-methyl-1-pentene	075144-24-0
